# Supplementary material for: Heterogeneity of Regional Brain Atrophy Patterns Associated with Distinct Progression Rates in Alzheimer’s Disease
Source: PubMed Central journal article supplement (PMC4664412; doi:10.1371/journal.pone.0142756), 2015-11-30
Supplement: pone.0142756.s002.pdf [file pone.0142756.s002.pdf]

**S1 Table. Age- and gender-specific normative value of normalized ROI volumes in CN subjects.**

| Age (years) |              | N   | Normalized ROI volumes |                 |                 |                 |
|-------------|--------------|-----|------------------------|-----------------|-----------------|-----------------|
|             |              |     | Hippocampal ROI        | Frontal ROI     | Temporal ROI    | Parietal ROI    |
| Male        | <b>55-69</b> | 57  | 0.0048 (0.0006)        | 0.0242 (0.0021) | 0.0130 (0.0012) | 0.0155 (0.0016) |
|             | <b>70-74</b> | 88  | 0.0046 (0.0006)        | 0.0239 (0.0021) | 0.0129 (0.0011) | 0.0152 (0.0016) |
|             | <b>75-79</b> | 103 | 0.0045 (0.0006)        | 0.0238 (0.0021) | 0.0128 (0.0012) | 0.0151 (0.0017) |
|             | <b>80-90</b> | 58  | 0.0042 (0.0005)        | 0.0232 (0.0022) | 0.0125 (0.0013) | 0.0146 (0.0017) |
| Female      | <b>55-69</b> | 51  | 0.0050 (0.0007)        | 0.0247 (0.0020) | 0.0137 (0.0015) | 0.0159 (0.0016) |
|             | <b>70-74</b> | 85  | 0.0048 (0.0006)        | 0.0244 (0.0022) | 0.0133 (0.0013) | 0.0155 (0.0016) |
|             | <b>75-79</b> | 99  | 0.0047 (0.0006)        | 0.0243 (0.0022) | 0.0132 (0.0013) | 0.0154 (0.0016) |
|             | <b>80-90</b> | 56  | 0.0046 (0.0005)        | 0.0239 (0.0023) | 0.0127 (0.0011) | 0.0149 (0.0017) |

Data are presented as mean (SD). ROI, Region-of-interest; CN, Cognitively normal.
