# Supplementary material for: Heterogeneity of Regional Brain Atrophy Patterns Associated with Distinct Progression Rates in Alzheimer’s Disease
Source: PubMed Central journal article supplement (PMC4664412; doi:10.1371/journal.pone.0142756), 2015-11-30
Supplement: pone.0142756.s003.pdf [file pone.0142756.s003.pdf]

**S2 Table. Linear mixed model analyses of neuropsychological measures over 2 years in AD subjects.**

|                       | Subtype  |          | Time     |          | Subtype × Time |          |
|-----------------------|----------|----------|----------|----------|----------------|----------|
|                       | <i>F</i> | <i>P</i> | <i>F</i> | <i>P</i> | <i>F</i>       | <i>P</i> |
| MMSE <sup>a</sup>     | 8.145    | < 0.001* | 34.236   | < 0.001* | 3.959          | 0.001*   |
| ADNI-Mem <sup>a</sup> | 7.192    | < 0.001* | 45.615   | < 0.001* | 2.430          | 0.027*   |
| ADNI-EF <sup>a</sup>  | 8.880    | < 0.001* | 42.031   | < 0.001* | 2.164          | 0.047*   |

MMSE; Mini-mental state examination; ADNI-Mem, composite score of memory function; ADNI-EF, composite score of executive function.

\* $p < 0.05$

<sup>a</sup> All mixed models included educational level as a covariate.
