# Supplementary material for: Heterogeneity of Regional Brain Atrophy Patterns Associated with Distinct Progression Rates in Alzheimer’s Disease
Source: PubMed Central journal article supplement (PMC4664412; doi:10.1371/journal.pone.0142756), 2015-11-30
Supplement: pone.0142756.s004.pdf [file pone.0142756.s004.pdf]

**S3 Table. Neuropsychological measures at 1-year and 2-year follow-up in CN and AD subjects.**

|                                      | CN <sup>a</sup> | AD           |              |              |              | <i>p</i><br>AD subtype <sup>b</sup> |
|--------------------------------------|-----------------|--------------|--------------|--------------|--------------|-------------------------------------|
|                                      |                 | BI           | HA           | CA           | BS           |                                     |
| <i>1-year follow-up</i> <sup>c</sup> |                 |              |              |              |              |                                     |
| MMSE                                 | 29.18 (1.13)    | 20.44 (4.03) | 22.52 (3.78) | 20.75 (5.69) | 24.71 (3.45) | 0.001 <sup>d</sup>                  |
| ADNI-Mem                             | 1.03 (0.62)     | -1.10 (0.57) | -0.90 (0.58) | -1.06 (0.75) | -0.49 (0.55) | 0.002 <sup>e</sup>                  |
| ADNI-EF                              | 0.84 (0.71)     | -1.21 (0.87) | -0.62 (0.99) | -1.65 (1.13) | -0.74 (0.86) | 0.002 <sup>f</sup>                  |
| <i>2-year follow-up</i> <sup>g</sup> |                 |              |              |              |              |                                     |
| MMSE                                 | 29.10 (1.12)    | 18.37 (5.57) | 20.95 (4.26) | 16.46 (7.11) | 23.46 (4.35) | 0.002 <sup>d</sup>                  |
| ADNI-Mem                             | 1.05 (0.62)     | -1.35 (0.58) | -1.03 (0.62) | -1.33 (0.63) | -0.65 (0.58) | < 0.001 <sup>e</sup>                |
| ADNI-EF                              | 0.82 (0.71)     | -1.62 (0.82) | -0.84 (0.97) | -1.96 (1.13) | -0.96 (0.81) | < 0.001 <sup>h</sup>                |

Data are shown as mean (SD). CN, Cognitively normal; AD, Alzheimer's disease; BI, Both impaired; HA, Hippocampal atrophy only; CA, Cortical atrophy only; BS, Both spared; MMSE; Mini-mental state examination; ADNI-Mem, composite score of memory function; ADNI-EF, composite score of executive function.

<sup>a</sup> Compared to CN, all AD subtypes had significantly lower MMSE, ADNI-Mem, ADNI-EF score at 1-year and 2-year follow-up ( $p < 0.001$ ).

<sup>b</sup> ANCOVA test with educational level as a covariate were performed among the AD subtypes.

<sup>c</sup> Number of available data at 1-year follow-up for MMSE, ADNI-Mem and ADNI-EF (CN (n = 205), BI (n = 88), HA (n = 23), CA (n = 16), BS (n = 14))

<sup>d</sup> Compared to the BS, the CA and BI had significantly greater impairments in MMSE total score at 1-year follow-up ( $p = 0.028$ ;  $p = 0.002$ , respectively) and at 2-year follow-up ( $p = 0.007$ ;  $p = 0.014$ , respectively) in post-hoc test.

<sup>e</sup> Compared to the BS, the CA and BI had significantly greater impairments in ADNI-Mem score at 1-year follow-up ( $p = 0.026$ ;  $p = 0.002$ , respectively) and at 2-year follow-up ( $p = 0.011$ ;  $p = 0.001$ , respectively) in post-hoc test.

<sup>f</sup> The BI and CA had significantly lower ADNI-EF score compared to the HA ( $p = 0.03$ ;  $p = 0.003$ , respectively) and the CA had significantly lower ADNI-EF score compared to the BS ( $p = 0.031$ ) at 1-year follow-up in post-hoc test.

<sup>g</sup> Number of available data at 2-year follow-up for MMSE (CN (n = 197), BI (n = 67), HA (n = 21), CA (n = 13), BS (n = 13)); for ADNI-Mem (CN (n = 197), BI (n = 70), HA (n = 21), CA (n = 13), BS (n = 13)); for ADNI-EF

(CN (n = 196), BI (n = 64), HA (n = 21), CA (n = 12), BS (n = 13))

<sup>h</sup> The BI and CA had significantly lower ADNI-EF score compared to the HA ( $p = 0.002$ ;  $p = 0.001$ , respectively) and the CA had significantly lower ADNI-EF score compared to the BS ( $p = 0.014$ ) at 2-year follow-up in post-hoc test.
